# Supplementary material
Source: PubMed Central journal article supplement (PMC6704479)
Supplement: NIHMS1046705-supplement-supplement_tables.pdf [file NIHMS1046705-supplement-supplement_tables.pdf]

*Supplemental Material Table 1: Comparison by gender and age of patients with xanthelasma and blepharoplasty controls*

| Characteristics |                 | Xanthelasma<br>Case (n=9) | Blepharoplasty<br>Control (n=8) | P value |
|-----------------|-----------------|---------------------------|---------------------------------|---------|
| Gender          |                 |                           |                                 | 0.15    |
|                 | Male            | 4 (44.4%)                 | 1 (12.5%)                       |         |
|                 | Female          | 5 (55.6%)                 | 7 (87.5%)                       |         |
|                 |                 |                           |                                 |         |
| Age (years)     |                 |                           |                                 |         |
|                 | Mean (SD)       | 59.9 (8.9)                | 65.5 (7.3)                      | 0.18    |
|                 | Median (Q1, Q3) | 59 (55, 63)               | 66 (60, 72)                     | 0.19    |
|                 | (Min, Max)      | (46, 79)                  | (55, 74)                        |         |

**Supplemental Material Table 2: Inter-eye difference in presence and intensity of expression of the inflammatory mediators (% cells with 1+, 2+ or 3+ expression) for patients with xanthelasma (n=9 subjects)**

| Antigen/<br>Immunostain | Dermis     |            |            |              | Epidermis    |            |             |             |
|-------------------------|------------|------------|------------|--------------|--------------|------------|-------------|-------------|
|                         | 3+         | 2+         | 1+         | 1+2+3+       | 3+           | 2+         | 1+          | 1+2+3+      |
| <b>CD3</b>              |            |            |            |              |              |            |             |             |
| Mean (SD)               | 0.6 (1.1)  | 0.3 (3.0)  | 0.0 (0.0)  | 0.9 (4.1)    | 0.0 (0.0)    | 0.0 (0.0)  | 0.0 (0.0)   | 0.0 (0.0)   |
| P-value*                | 0.23       | 0.81       | .          | 0.60         | .            | .          | .           | .           |
| <b>CD163</b>            |            |            |            |              |              |            |             |             |
| Mean (SD)               | 0.0 (1.6)  | -0.1 (0.9) | -0.9 (4.5) | -1.0 (4.8)   | 0.0 (0.0)    | 0.0 (0.0)  | 0.0 (0.0)   | 0.0 (0.0)   |
| P-value*                | 1.00       | 0.69       | 0.63       | 0.60         | .            | .          | .           | .           |
| <b>MPO</b>              |            |            |            |              |              |            |             |             |
| Mean (SD)               | -0.1 (1.2) | -0.1 (1.6) | -1.4 (5.2) | -1.7 (6.8)   | 0.0 (0.0)    | 0.0 (0.0)  | 0.0 (0.0)   | 0.0 (0.0)   |
| P-value*                | 0.77       | 0.82       | 0.50       | 0.53         | .            | .          | .           | .           |
| <b>COX-1</b>            |            |            |            |              |              |            |             |             |
| Mean (SD)               | 1.3 (3.7)  | 0.8 (1.2)  | 0.8 (3.1)  | 3.0 (6.1)    | 5.0 (4.5)    | 2.2 (2.6)  | 0.8 (2.0)   | 8.0 (5.2)   |
| P-value*                | 0.41       | 0.14       | 0.54       | 0.28         | 0.04         | 0.09       | 0.36        | 0.01        |
| <b>iNOS</b>             |            |            |            |              |              |            |             |             |
| Mean (SD)               | 0.0 (0.0)  | -0.4 (0.8) | -2.0 (6.9) | -2.4 (7.5)   | -1.1 (2.6)   | -2.3 (4.6) | -4.7 (20.6) | -8.1 (21.7) |
| P-value*                | .          | 0.20       | 0.47       | 0.43         | 0.29         | 0.24       | 0.57        | 0.36        |
| <b>MMP9</b>             |            |            |            |              |              |            |             |             |
| Mean (SD)               | -2.9 (6.7) | -2.0 (4.7) | -6.6 (9.9) | -11.4 (18.0) | -11.7 (14.9) | -1.9 (4.6) | 4.7 (6.4)   | -8.9 (15.3) |
| P-value*                | 0.31       | 0.30       | 0.13       | 0.14         | 0.08         | 0.33       | 0.10        | 0.18        |

\*Paired t test

***Supplemental Material Table 3: Inter-eye difference in the intensity of inflammation on Hematoxylin-Eosin (H&E) stain for patients with xanthelasma (n=9 subjects)***

| <b>Inter-eye difference (H&amp;E stain)</b> | <b>Inflammation Intensity</b> |
|---------------------------------------------|-------------------------------|
| H&E Stain                                   |                               |
| Mean (SD)                                   | 0.2 (0.4)                     |
| P-value, paired t test                      | 0.36                          |
